# Supplementary material
Source: PubMed Central journal article supplement (PMC61143)

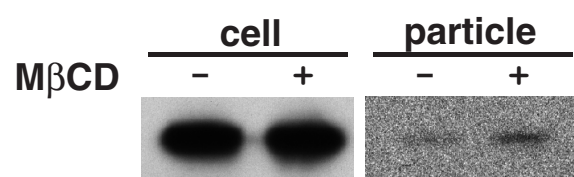

Supplement: pnas_98_24_13925__10.pdf [file pnas_98_24_13925__10.pdf]

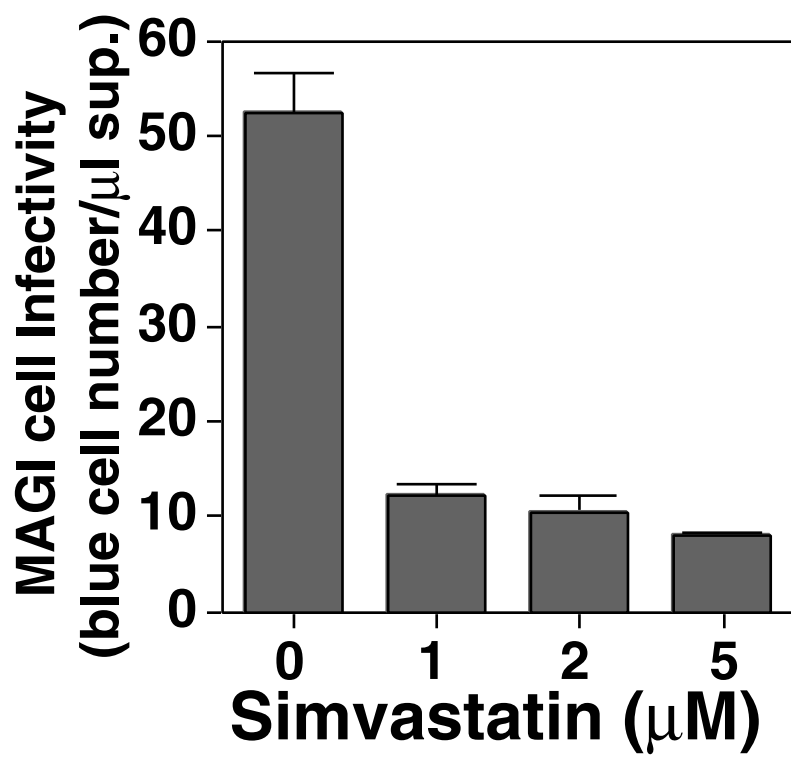

Supplement: pnas_98_24_13925__11.pdf [file pnas_98_24_13925__11.pdf]

**A.**

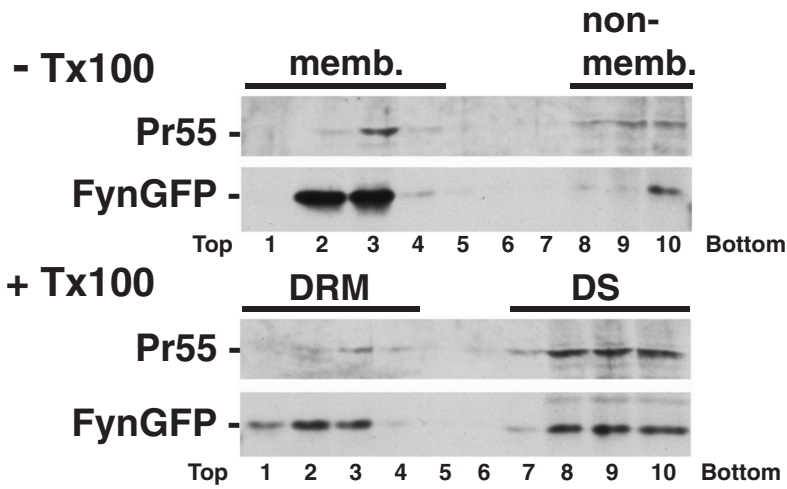

**B.**

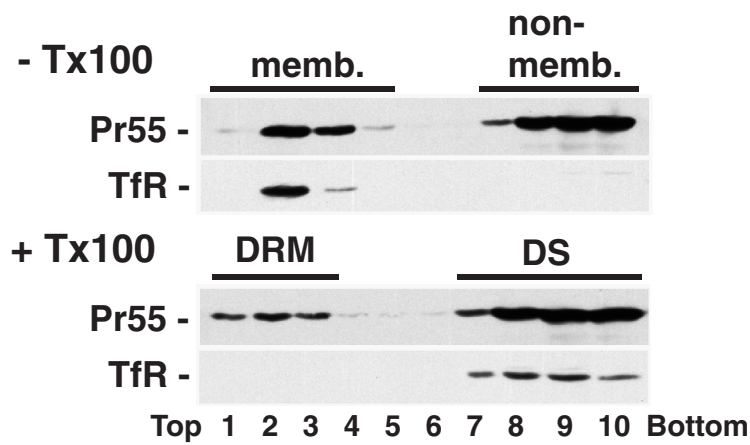

**C.**

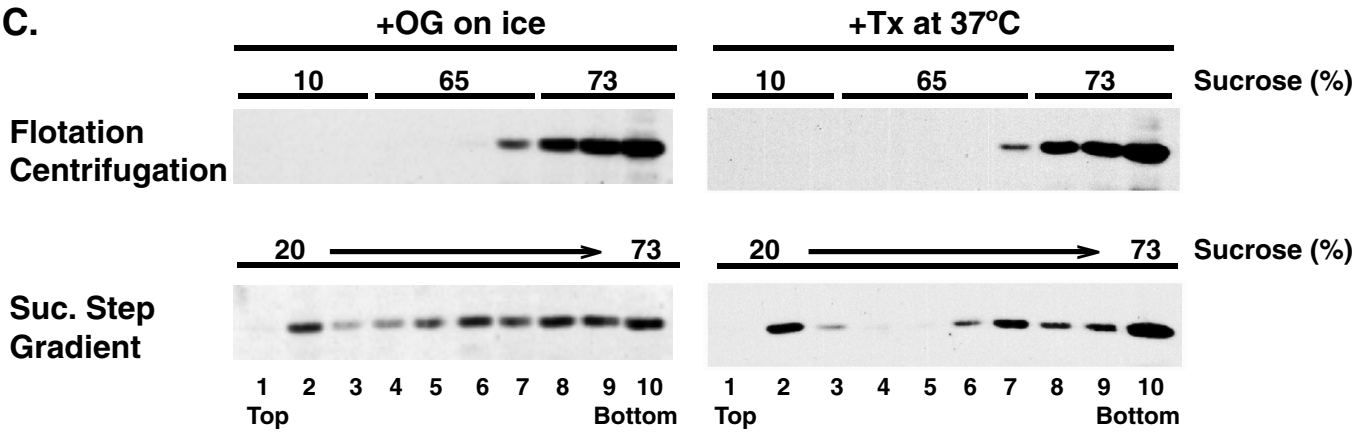

Supplement: pnas_98_24_13925__7.pdf [file pnas_98_24_13925__7.pdf]

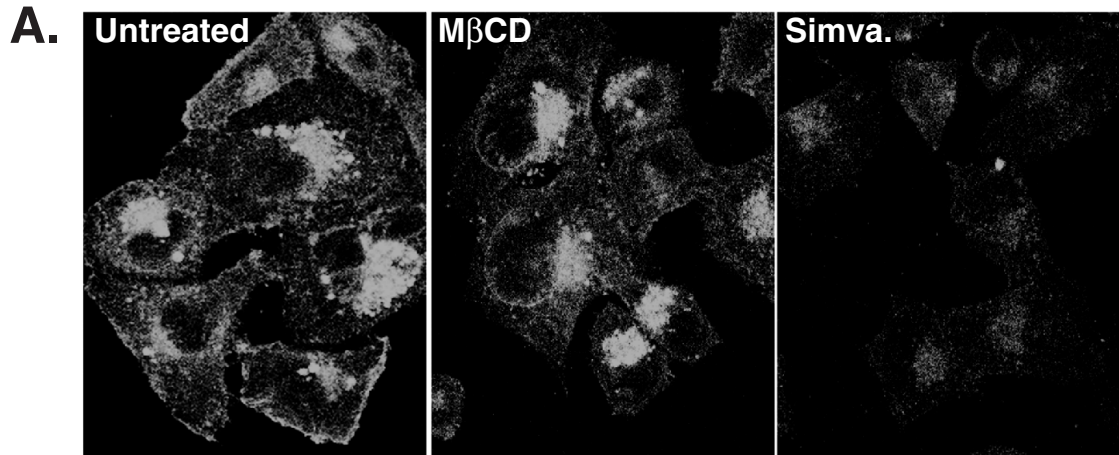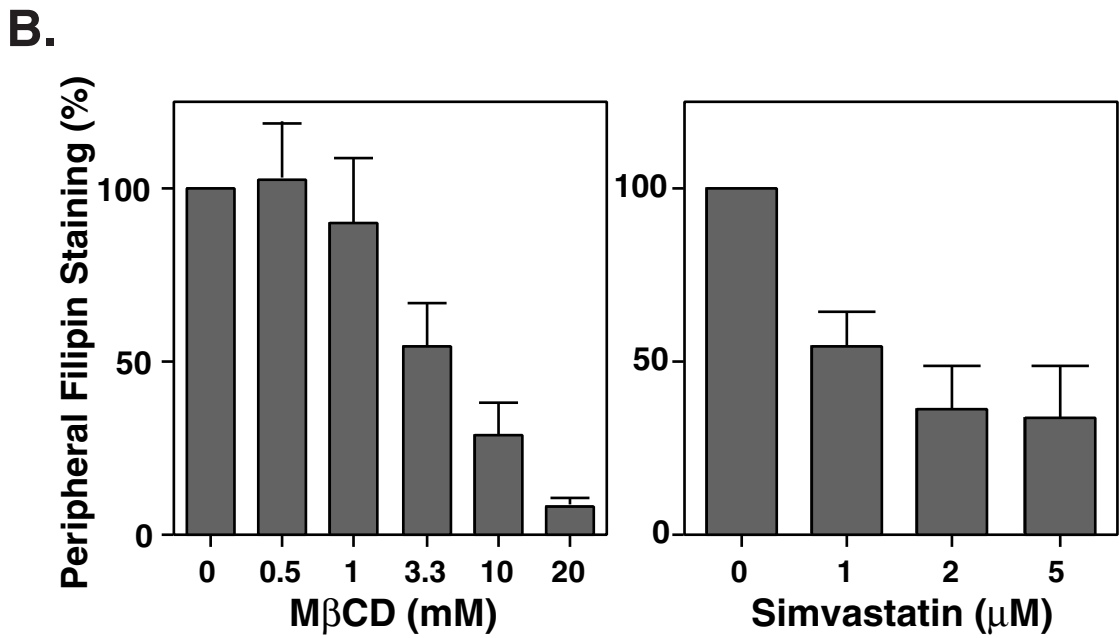

Supplement: pnas_98_24_13925__8.pdf [file pnas_98_24_13925__8.pdf]

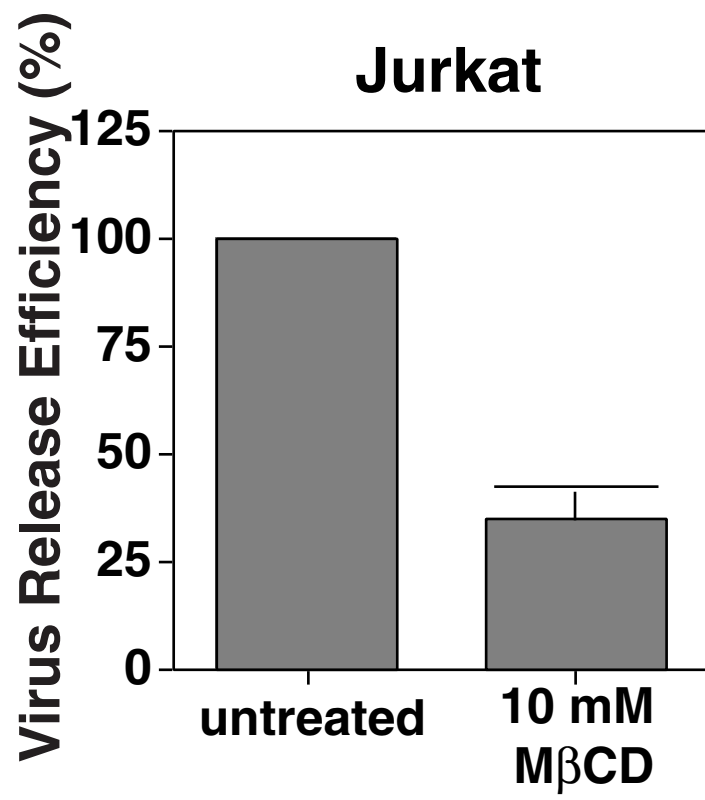

Supplement: pnas_98_24_13925__9.pdf [file pnas_98_24_13925__9.pdf]
